# Supplementary material for: Co-delivery of antigens and immunostimulantsviaa polymersome for improvement of antigen-specific immune response
Source: Royal Society of Chemistry journal article supplement (doi:10.1039/d0tb00892c), 2020-01-01
Supplement: d0tb00892c1.pdf [file d0tb00892c1.pdf]

Electronic Supplementary Information for

# Co-delivery of antigen and immunostimulant via a polymersome for improvement of antigen-specific immune response

*Jong-Woo Lim,<sup>‡af</sup> Woonsung Na,<sup>‡cd</sup>, Hyun-Ouk Kim,<sup>‡e</sup> Minjoo Yeom,<sup>b</sup> Aram Kang,<sup>b</sup>  
Geunseon Park,<sup>a</sup> Chaewon Park,<sup>a</sup> Jisun Ki,<sup>a</sup> Sojeong Lee,<sup>a</sup> Bud Jung,<sup>b</sup> Hyoung Hwa  
Jeong,<sup>f</sup> Daewon Park,<sup>g</sup> Daesub Song,<sup>\*b</sup> and Seungjoo Haam,<sup>\*a</sup>*

<sup>a</sup> Department of Chemical & Biomolecular Engineering, Yonsei University, Republic of Korea

<sup>b</sup> Department of Radiology, College of Medicine, Yonsei University, Republic of Korea

<sup>c</sup> Department of Radiation Oncology, Medical Physics, Stanford University, USA.

<sup>d</sup> Korea Basic Science Institute (KBSI)., Republic of Korea

<sup>e</sup> Department of Pharmacy, College of Pharmacy, Korea University, Republic of Korea.

<sup>a</sup> Department of Chemical and Biomolecular Engineering, Yonsei University, Yonsei-ro 50, Seoul, 03722, Republic of Korea. E-mail: haam@yonsei.ac.kr

<sup>b</sup> College of Pharmacy, Korea University, Sejong-ro, Sejong 30019, Republic of Korea. E-mail: sds1@korea.ac.kr

<sup>c</sup> College of Veterinary Medicine, Chonnam National University.

<sup>d</sup> Animal Medical Institute, Chonnam National University, Gwangju, Republic of Korea.

<sup>e</sup> Department of Biotechnology and Bioengineering, Kangwon National University,

Gangwondaehak-gil 1, Chuncheon 24341, Republic of Korea

<sup>f</sup> Huvet Bio inc. 127 Beobwon-ro, Seoul, Republic of Korea.

<sup>g</sup> Department of Bioengineering, University of Colorado Denver Anschutz Medical Campus, USA

<sup>‡</sup> These authors contributed equally.

\* Correspondence should be addressed to D. Song (E-mail: sds1@korea.ac.kr) and S. Haam (E-mail: haam@yonsei.ac.kr)

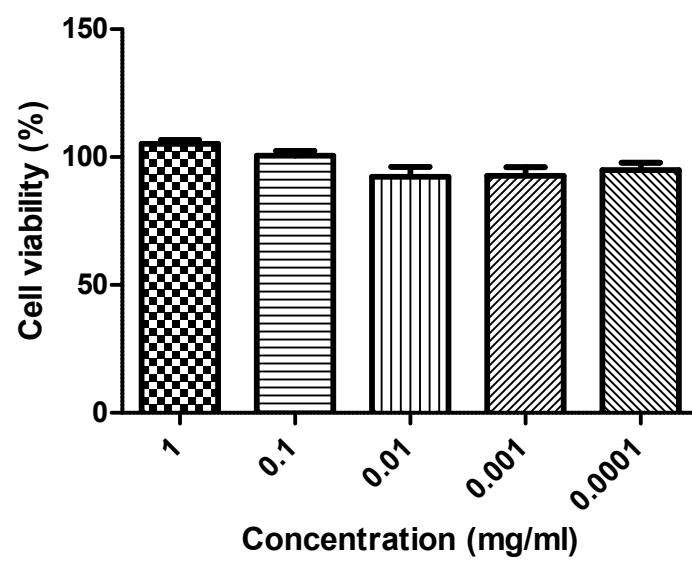

**Figure S1.** Cytotoxicity of mPEG-b-PLA by Ez-cytox cell viability test for R264.7 cells. Data are expressed as the mean  $\pm$  S.E.M. (n=5).

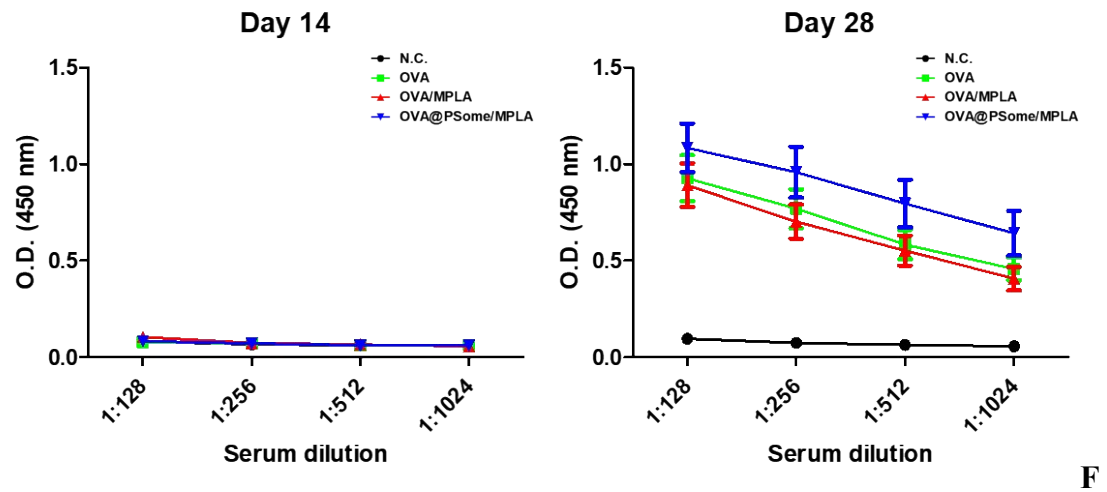

**figure S2.** OVA-specific total IgG titer in the serum of mice vaccinated with OVA, OVA/MPLA, and OVA@PSome/MPLA 2 weeks after first and second vaccinations. Data are expressed as mean  $\pm$  S.E.M. (n=5).

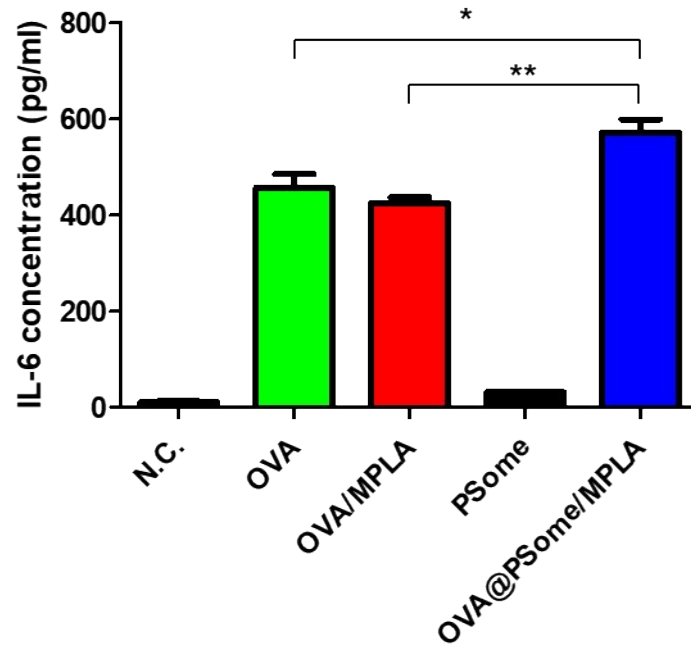

**Figure S3.** Quantitative comparison of IL-6 induction in xxx cells. Expression levels of IL-6 in macrophage was stimulated with OVA only (2.5  $\mu$ g), OVA (2.5  $\mu$ g)/MPLA (0.4  $\mu$ g), PSome (83  $\mu$ g) and OVA (2.5  $\mu$ g)@PSome (83  $\mu$ g)/MPLA (0.4  $\mu$ g). The expression level of IL-6 in the supernatants was determined by ELISA. Student t-test was used for statistical analysis. Data are presented as the mean  $\pm$  S.E.M. (n=3; \*p < 0.05, \*\*p < 0.01).

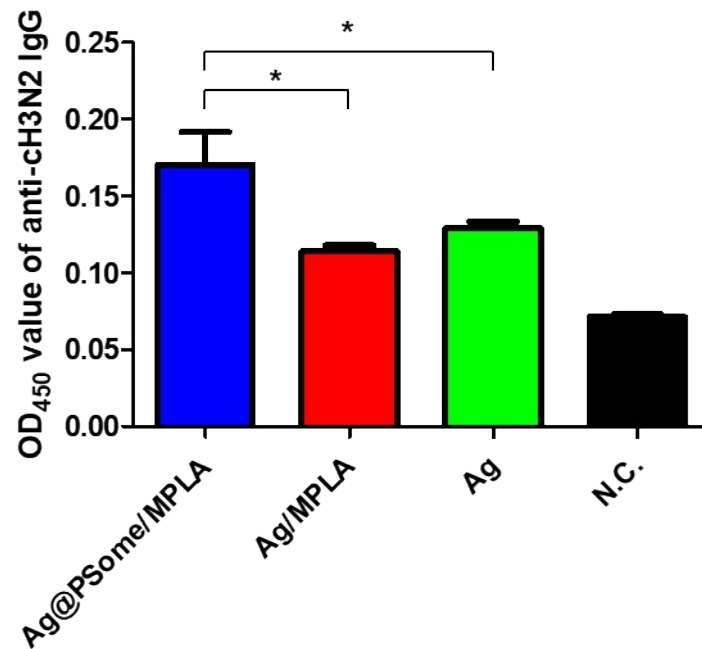

**Figure S4.** Quantitative comparison of cH3N2-specific Ab induction in mice group (n=5 for each group) at 2 wks after final vaccination. Induction of cH3N2-specific to (a) serum total IgG in mice vaccinated with inactivated Ag only, Ag/MPLA, and Ag@PSome/MPLA were determined using ELISA. Student t-test were used for statistical analysis. Data are presented as the mean  $\pm$  S.E.M. (\*p < 0.05).

**Table S1.** Characterization of synthetic mPEG-b-PLA copolymers

| Polymer <sup>a</sup>                    | $f_{\text{mPEG}}$ <sup>b</sup><br>(%) | M.W. <sup>c</sup><br>(g/mol) | $f_{\text{mPEG}}$ <sup>d</sup><br>(%) | M.W. <sup>e</sup><br>(g/mol) |
|-----------------------------------------|---------------------------------------|------------------------------|---------------------------------------|------------------------------|
| mPEG <sub>44</sub> -b-PLA <sub>39</sub> | 0.385                                 | 5191.7                       | 0.416                                 | 4803.2                       |
| mPEG <sub>44</sub> -b-PLA <sub>47</sub> | 0.278                                 | 7179.6                       | 0.371                                 | 5390.5                       |

<sup>a</sup> Degree of PLA polymerization was determined by GPC.

<sup>b, d</sup> Calculated mass fraction of mPEG in block copolymers.  $f_{\text{mPEG}} = \text{Mass}_{\text{mPEG}} / (\text{Mass}_{\text{PLA}} + \text{Mass}_{\text{mPEG}})$

<sup>c</sup> Determined from <sup>1</sup>H-NMR analysis by calculating the ratio of the methyl groups within PLA.

<sup>e</sup> Determined from GPC measurement analysis by calculating the standard curve of PEG series.

**Table S2.** Particle characterization of PSome nanoparticle constructs used in this study.

| Method              | Formulation          | Hydrodynamic diameter<br>(nm) | Zeta potential<br>(mV) | Polydispersity index | Diameter after 14 days at 4°C<br>(nm) |
|---------------------|----------------------|-------------------------------|------------------------|----------------------|---------------------------------------|
| Thin film hydration | OVA@PSome#1/<br>MPLA | 70.4±32.3                     | -12.38                 | 0.234                | 92.0±40.3                             |
|                     | OVA@PSome#2/<br>MPLA | 98.9±31.7                     | -14.73                 | 0.093                | 88.8±19                               |

Measured by dynamic light scattering. Hydrodynamic diameter values are given as mean ± S.D.
